# Supplementary material
Source: PubMed Central journal article supplement (PMC4464542)
Supplement: 97320630011254S1.pdf [file 97320630011254S1.pdf]

## Supplementary material:

**Table 1:** Summary of the PGD data for monogenic diseases.

| Indications                                   | DMD        | DM1        | OTCD     | FCMD    | ALD       | Leigh syndrome | Total         |
|-----------------------------------------------|------------|------------|----------|---------|-----------|----------------|---------------|
| Cycles to OR                                  | 59         | 31         | 6        | 1       | 1         | 1              | 99            |
| Number infertile                              | 24         | 9          | 1        | 1       | 1         | 1              | 37            |
| Female age (average)                          | 38         | 36         | 42       | 38      | 41        | 39             | 38            |
| Cancelled before IVF/ICSI                     | 1          | 1          | 0        | 0       | 0         | 0              | 2             |
| ART method                                    |            |            |          |         |           |                |               |
| IVF                                           | 0          | 0          | 0        | 0       | 0         | 0              | 0             |
| ICSI                                          | 58         | 28         | 6        | 1       | 1         | 1              | 95            |
| IVF+ICSI                                      | 0          | 0          | 0        | 0       | 0         | 0              | 0             |
| Unknown                                       | 0          | 2          | 0        | 0       | 0         | 0              | 2             |
| Cancelled after IVF/ICSI                      | 1          | 0          | 1        | 0       | 0         | 0              | 2             |
| Cycles to PGD                                 | 57         | 30         | 5        | 1       | 1         | 1              | 95            |
| Zona breaching                                |            |            |          |         |           |                |               |
| AT drilling                                   | 0          | 0          | 0        | 0       | 0         | 0              | 0             |
| Laser drilling                                | 57         | 23         | 0        | 1       | 1         | 1              | 83            |
| Mechanical                                    | 0          | 0          | 0        | 0       | 0         | 0              | 0             |
| Laser drilling + Mechanical                   | 0          | 0          | 5        | 0       | 0         | 0              | 5             |
| Unknown                                       | 0          | 0          | 0        | 0       | 0         | 0              | 0             |
| Biopsy method                                 |            |            |          |         |           |                |               |
| Polar body biopsy                             | 0          | 0          | 0        | 0       | 0         | 0              | 0             |
| Cleavage aspiration                           | 57         | 23         | 5        | 1       | 1         | 1              | 88            |
| Cleavage extrusion                            | 0          | 0          | 0        | 0       | 0         | 0              | 0             |
| Blastocyst                                    | 0          | 0          | 0        | 0       | 0         | 0              | 0             |
| Indications                                   | DMD        | DM1        | OTCD     | FCMD    | ALD       | Leigh syndrome | Total         |
| Embryology                                    |            |            |          |         |           |                |               |
| COCs (mean / OR)                              | 614 (10.4) | 360 (11.6) | 52 (8.7) | 8 (8.0) | 13 (13.0) | 3 (3.0)        | 1050 (10.6)   |
| Fertilized                                    | 395        | 224        | 29       | 5       | 7         | 1              | 661           |
| Biopsied                                      | 331        | 186        | 25       | 4       | 7         | 1              | 554           |
| Frozen before biopsy                          | 0          | 0          | 0        | 0       | 0         | 0              | 0             |
| Successfully biopsied                         | 330        | 174        | 25       | 4       | 7         | 1              | 541           |
| Diagnosed (mean / OR)                         | 254        | 101        | 22       | -       | 5         | 1              | 383           |
| Transferable (mean / OR)                      | 175        | 48         | 12       | -       | 5         | 0              | 240           |
| Transferable rate (% / diagnosed)             | 68.9       | 47.5       | 54.5     | -       | 100       | 0              | 62.7          |
| Transferred                                   | 125        | 30         | 7        | -       | 5         | 0              | 167           |
| Clinical outcome                              |            |            |          |         |           |                |               |
| Cycles to ET (% / OR)                         | 90 (153.0) | 19 (61.3)  | 5 (83.3) | 0 (0.0) | 3 (300.0) | 0 (0.0)        | 117.0 (118.2) |
| hCG positive                                  | 14         | 3          | 0        | 0       | 2         | 0              | 19            |
| Positive FHB                                  | 12         | 1          | 0        | 0       | 1         | 0              | 14            |
| Number of FHB                                 | 13         | 1          | 0        | 0       | 1         | 0              | 15            |
| Clinical pregnancy rate (% / OR)              | 20.3       | 3.2        | 0        | 0       | 100       | 0              | 14.1          |
| Clinical pregnancy rate (% / ET)              | 13.3       | 5.3        | 0        | 0       | 33.3      | 0              | 12.0          |
| Implantation rate (FHB / embryos transferred) | 10.4       | 3.3        | 0        | 0       | 20        | 0              | 9.0           |
| Deliveries                                    | 9          | 0          | 0        | 0       | 1         | 0              | 10            |
| Miscarriages                                  | 5          | 2          | 0        | 0       | 1         | 0              | 8             |
| Ectopic pregnancies                           | 0          | 1          | 0        | 0       | 0         | 0              | 1             |
| Twins                                         | 1          | 0          | 0        | 0       | 0         | 0              | 1             |

DMD, Duchenne muscular dystrophy;DM1, myotonic dystrophy type 1;OTCD, Ornithine transcarbamylase deficiency; FCMD, Fukuyama congenital muscular dystrophy;ALD, Adrenoleukodystrophy; OR, oocyte retrieval; AT, acid Tyrode's solution; COC, cumulus-oocyte complex; ET, embryo transfer; ART, assisted reproduction technology; FHB, fetal heart beat.

**Table 2:** Summary of the PGD data for chromosomal abnormalities.

ISSN 0973-2063 (online) 0973-8894 (print)

Bioinformatics 11(5): 254-260 (2015)

| Indications                      | Rob, male carrier | Rob, female carrier | Rcp, male carrier | Rcp, female carrier | Total      |
|----------------------------------|-------------------|---------------------|-------------------|---------------------|------------|
| Cycles to OR                     | 13                | 48                  | 179               | 332                 | 572        |
| Number infertile                 | 4                 | 16                  | 67                | 87                  | 174        |
| Female age (average)             | 43                | 39                  | 39                | 39                  | 40         |
| Cancelled before IVF/ICSI        | 0                 | 2                   | 8                 | 14                  | 24         |
| ART method                       |                   |                     |                   |                     |            |
| IVF                              | 0                 | 11                  | 61                | 76                  | 148        |
| ICSI                             | 13                | 37                  | 105               | 239                 | 394        |
| IVF+ICSI                         | 0                 | 0                   | 5                 | 3                   | 8          |
| Unknown                          | 0                 | 0                   | 0                 | 0                   | 0          |
| Cancelled after IVF/ICSI         | 1                 | 5                   | 11                | 20                  | 37         |
| Cycles to PGD                    | 12                | 41                  | 160               | 298                 | 511        |
| Zona breaching                   |                   |                     |                   |                     |            |
| AT drilling                      | 0                 | 1                   | 5                 | 13                  | 19         |
| Laser drilling                   | 10                | 20                  | 61                | 156                 | 247        |
| Mechanical                       | 2                 | 20                  | 94                | 129                 | 245        |
| Unknown                          | 0                 | 0                   | 0                 | 0                   | 0          |
| Biopsy method                    |                   |                     |                   |                     |            |
| Polar body biopsy                | 0                 | 0                   | 0                 | 3                   | 3          |
| Cleavage aspiration              | 10                | 38                  | 130               | 262                 | 440        |
| Cleavage extrusion               | 2                 | 3                   | 30                | 33                  | 68         |
| Blastocyst                       | 0                 | 0                   | 0                 | 0                   | 0          |
| Indications                      | Rob, male carrier | Rob, female carrier | Rcp, male carrier | Rcp, female carrier | Total      |
| Embryology                       |                   |                     |                   |                     |            |
| COCs (mean / OR)                 | 63 (4.8)          | 350 (7.3)           | 1322 (7.4)        | 2405 (7.2)          | 4140 (7.2) |
| Fertilized                       | 34                | 225                 | 922               | 1563                | 2744       |
| Biopsied                         | 11                | 166                 | 636               | 1009                | 1822       |
| Frozen before biopsy             | 13                | 0                   | 80                | 228                 | 321        |
| Successfully biopsied            | 11                | 166                 | 635               | 1007                | 1819       |
| Diagnosed (mean / OR)            | 11                | 148                 | 626               | 925                 | 1710       |
| Transferable (mean / OR)         | 3                 | 42                  | 177               | 214                 | 436        |
| Transferable rate (% / OR)       | 27.3              | 28.4                | 28.3              | 23.1                | 25.5       |
| diagnosed)                       |                   |                     |                   |                     |            |
| Transferred                      | 2                 | 23                  | 114               | 153                 | 292        |
| Clinical outcome                 |                   |                     |                   |                     |            |
| Cycles to ET (% / OR)            | 2 (15.4)          | 16 (33.3)           | 83 (46.4)         | 115 (34.6)          | 216 (37.8) |
| hCG positive                     | 0                 | 5                   | 45                | 51                  | 101        |
| Positive FHB                     | 0                 | 4                   | 40                | 33                  | 77         |
| Number of FHB                    | 0                 | 5                   | 41                | 34                  | 80         |
| Clinical pregnancy rate (% / OR) | 0                 | 8.3                 | 22.3              | 9.9                 | 13.5       |
| Clinical pregnancy rate (% / ET) | 0                 | 25                  | 48.2              | 28.7                | 35.6       |
| Implantation rate (FHB / OR)     | 0                 | 21.7                | 36.0              | 22.2                | 27.4       |
| embryos transferred)             |                   |                     |                   |                     |            |
| Deliveries                       | 0                 | 3                   | 28                | 29                  | 60         |
| Miscarriages                     | 0                 | 2                   | 12                | 22                  | 36         |
| Ectopic pregnancies              | 0                 | 0                   | 0                 | 2                   | 2          |
| Twins                            | 0                 | 1                   | 1                 | 1                   | 3          |

Rob, Robertsonian translocation; Rcp, Reciprocal translocation; OR, oocyte retrieval; AT, acid Tyrode's solution; COC, cumulus-oocyte complex; ET, embryo transfer; ART, assisted reproduction technology; FHB, fetal heart beat.

**Table 3:** Prenatal and postnatal diagnosis.

| Methods             | Total |    | Results |          |        |
|---------------------|-------|----|---------|----------|--------|
|                     |       |    | Normal  | Abnormal | Failed |
| Prenatal diagnosis  |       |    |         |          |        |
| Amniocentesis       | 26    | 26 | 0       | 0        | 0      |
| CVS                 | 0     | 0  | 0       | 0        | 0      |
| Cordocentesis       | 1     | 1  | 0       | 0        | 0      |
| Unexamined          | 30    |    |         |          |        |
| Unknown             | 13    |    |         |          |        |
| Postnatal diagnosis |       |    |         |          |        |
| Karyotype           | 3     | 3  | 0       | 0        | 0      |
| DNA test            | 1     | 1  | 0       | 0        | 0      |

CVS, chorionic villus sampling.

**Table 4:** Method of delivery, gestational age, and infants born.

|                      | Singletons | Twins | Total |
|----------------------|------------|-------|-------|
| No. deliveries       | 65         | 5     | 70    |
| Method of delivery   |            |       |       |
| Vaginal              | 32         | 0     | 32    |
| Caesarian            | 26         | 5     | 31    |
| Unknown              | 7          | 0     | 7     |
| Term at delivery     |            |       |       |
| Preterm              | 6          | 4     | 10    |
| Term                 | 57         | 1     | 58    |
| Post term            | 0          | 0     | 0     |
| Unknown              | 2          | 0     | 2     |
| Sex                  |            |       |       |
| Male                 | 30         | 2     | 32    |
| Female               | 32         | 8     | 40    |
| Unknown              | 3          | 0     | 3     |
| Mean birthweight (g) | 2964       | 2356  | 2919  |
